# Supplementary material
Source: publisher site journal article supplement (https://www.dovepress.com/article/313799)

**Supplemental Data**

**Table S1:** Functional classifications of 895 genes differentially expressed in lipopolysaccharide treated mammary gland compared to PBS treated gland.Each gene was classified to only one of 16 categories (processes) based on their known cellular functions.

| Differentially expressed gene | Attributed process | Up/Down |
| --- | --- | --- |
| podoplanin(Pdpn) | Angiogenesis | Up |
| adrenomedullin(Adm) | Angiogenesis | Up |
| endothelin converting enzyme 1(Ece1) | Angiogenesis | Up |
| extracellular matrix protein 1(Ecm1) | Angiogenesis | Up |
| transforming Growth factor, beta 2(Tgfb2) | Angiogenesis | Up |
| vascular endothelial Growth factor A(Vegfa) | Angiogenesis | Down |
| neuropilin 1(Nrp1) | Angiogenesis | Down |
| delta-like 4 (Drosophila)(Dll4) | Angiogenesis | Down |
| transmembrane protein 100(Tmem100) | Angiogenesis | Down |
| tumor necrosis factor receptor superfamily, member 10b(Tnfrsf10b) | Apoptosis | Up |
| tumor necrosis factor receptor superfamily, member 12a(Tnfrsf12a) | Apoptosis | Up |
| purinergic receptor P2Y, G-protein coupled 2(P2ry2) | Apoptosis | Up |
| shisa family member 5(Shisa5) | Apoptosis | Up |
| tumor necrosis factor (ligand) superfamily, member 10(Tnfsf10) | Apoptosis | Up |
| membrane-spanning 4-domains, subfamily A, member 6D(Ms4a6d) | Apoptosis | Up |
| BCL2-antagonist/killer 1(Bak1) | Apoptosis | Up |
| BCL2-associated X protein(Bax) | Apoptosis | Up |
| BCL2-interacting killer(Bik) | Apoptosis | Up |
| Harvey rat sarcoma virus oncogene(Hras) | Apoptosis | Up |
| PYD and CARD domain containing(Pycard) | Apoptosis | Up |
| Src homology 2 domain containing F(Shf) | Apoptosis | Up |
| TNFAIP3 interacting protein 1(Tnip1) | Apoptosis | Up |
| TNFAIP3 interacting protein 3(Tnip3) | Apoptosis | Up |
| XIAP associated factor 1(Xaf1) | Apoptosis | Up |
| carcinoembryonic antigen-related cell adhesion molecule 1(Ceacam1) | Apoptosis | Up |
| caspase 12(Casp12) | Apoptosis | Up |
| caspase 7(Casp7) | Apoptosis | Up |
| feminization 1 homolog b (C. elegans)(Fem1b) | Apoptosis | Up |
| Growth arrest and DNA-damage-inducible 45 beta(Gadd45b) | Apoptosis | Up |
| metallothionein 2(Mt2) | Apoptosis | Up |
| promyelocytic leukemia(Pml) | Apoptosis | Up |
| protein phosphatase 1F (PP2C domain containing)(Ppm1f) | Apoptosis | Up |
| transglutaminase 2, C polypeptide(Tgm2) | Apoptosis | Up |
| mixed lineage kinase domain-like(Mlkl) | Apoptosis | Up |
| prostate transmembrane protein, androgen induced 1(Pmepa1) | Apoptosis | Up |
| paternally expressed 3(Peg3) | Apoptosis | Down |
| death associated protein kinase 1(Dapk1) | Apoptosis | Down |
| cell death-inducing DNA fragmentation factor, alpha subunit-like effector A(Cidea) | Apoptosis | Down |
| lectin, galactose binding, soluble 12(Lgals12) | Apoptosis | Down |
| programmed cell death 4(Pdcd4) | Apoptosis | Down |
| SNF related kinase(Snrk) | Apoptosis | Down |
| calcium/calmodulin-dependent protein kinase ID(Camk1d) | Apoptosis | Down |
| tripartite motif-containing 39(Trim39) | Apoptosis | Down |
| lectin, galactose binding, soluble 7(Lgals7) | Apoptosis | Down |
| ankyrin repeat domain 24(Ankrd24) | Apoptosis | Down |
| gasdermin C(Gsdmc) | Apoptosis | Down |
| BCL2-associated athanogene 1(Bag1) | Apoptosis prevention | Up |
| DNA damage-induced Apoptosis suppressor(Ddias) | Apoptosis prevention | Up |
| Ras association (RalGDS/AF-6) domain family (N-terminal) member 7(Rassf7) | Apoptosis prevention | Up |
| mucin 4(Muc4) | Apoptosis prevention | Up |
| nucleolar protein 3 (Apoptosis repressor with CARD domain)(Nol3) | Apoptosis prevention | Up |
| olfactomedin 4(Olfm4) | Apoptosis prevention | Up |
| major facilitator superfamily domain containing 9(Mfsd9) | Apoptosis prevention | Up |
| transmembrane protein 109(Tmem109) | Apoptosis prevention | Up |
| tumor necrosis factor receptor superfamily, member 22(Tnfrsf22) | Apoptosis prevention | Down |
| major facilitator superfamily domain containing 11(Mfsd11) | Apoptosis prevention | Down |
| Fas apoptotic inhibitory molecule 2(Faim2) | Apoptosis prevention | Down |
| BCL2-like 2(Bcl2l2) | Apoptosis prevention | Down |
| RAN, member RAS oncogene family(Ran) | Cell cycle | Up |
| RAS protein activator like 1 (GAP1 like)(Rasal1) | Cell cycle | Up |
| SET and MYND domain containing 5(Smyd5) | Cell cycle | Up |
| ZW10 interactor(Zwint) | Cell cycle | Up |
| arginine vasopressin-induced 1(Avpi1) | Cell cycle | Up |
| cyclin I(Ccni) | Cell cycle | Up |
| cyclin-dependent kinase inhibitor 1A (P21)(Cdkn1a) | Cell cycle | Up |
| dual specificity phosphatase 7(Dusp7) | Cell cycle | Up |
| minichromosome maintenance complex component 6(Mcm6) | Cell cycle | Up |
| DNA primase, p58 subunit(Prim2) | Cell cycle | Up |
| G0/G1 switch gene 2(G0s2) | Cell cycle | Down |
| THAP domain containing, Apoptosis associated protein 2(Thap2) | Cell cycle | Down |
| UFM1 specific ligase 1(Ufl1) | Cell cycle | Down |
| plasminogen activator, urokinase receptor(Plaur) | Clotting | Up |
| endonuclease domain containing 1(Endod1) | Clotting | Up |
| selectin, platelet(Selp) | Clotting | Up |
| coagulation factor XIII, A1 subunit(F13a1) | Clotting | Down |
| fibronectin type III domain containing 1(Fndc1) | Clotting | Down |
| LIM and SH3 protein 1(Lasp1) | Cytoskeleton | Up |
| testis derived transcript(Tes) | Cytoskeleton | Up |
| LIM domain and actin binding 1(Lima1) | Cytoskeleton | Up |
| zinc finger protein 185(Zfp185) | Cytoskeleton | Up |
| S100 calcium binding protein A11(S100a11) | Cytoskeleton | Up |
| S100 calcium binding protein A9 (calgranulin B)(S100a9) | Cytoskeleton | Up |
| S100 calcium binding protein A8 (calgranulin A)(S100a8) | Cytoskeleton | Up |
| S100 calcium binding protein A6 (calcyclin)(S100a6) | Cytoskeleton | Up |
| S100 calcium binding protein A16(S100a16) | Cytoskeleton | Up |
| S100 calcium binding protein A13(S100a13) | Cytoskeleton | Up |
| tubulin, beta 2A class IIA(Tubb2a) | Cytoskeleton | Up |
| tubulin, alpha 1C(Tuba1c) | Cytoskeleton | Up |
| tubulin, alpha 8(Tuba8) | Cytoskeleton | Up |
| tubulin, beta 4B class IVB(Tubb4b) | Cytoskeleton | Up |
| tubulin, beta 5 class I(Tubb5) | Cytoskeleton | Up |
| Rho family GTPase 1(Rnd1) | Cytoskeleton | Up |
| integrin beta 6(Itgb6) | Cytoskeleton | Up |
| syndecan 4(Sdc4) | Cytoskeleton | Up |
| syndecan 1(Sdc1) | Cytoskeleton | Up |
| plexin B1(Plxnb1) | Cytoskeleton | Up |
| DnaJ heat shock protein family (Hsp40) member B6(Dnajb6) | Cytoskeleton | Up |
| MARCKS-like 1(Marcksl1) | Cytoskeleton | Up |
| MIT, microtubule interacting and transport, domain containing 1(Mitd1) | Cytoskeleton | Up |
| N(alpha)-acetyltransferase 20, NatB catalytic subunit(Naa20) | Cytoskeleton | Up |
| Rho guanine nucleotide exchange factor (GEF) 17(Arhgef17) | Cytoskeleton | Up |
| S100 calcium binding protein A10 (calpactin)(S100a10) | Cytoskeleton | Up |
| S100 calcium binding protein A14(S100a14) | Cytoskeleton | Up |
| actin related protein 2/3 complex, subunit 1B(Arpc1b) | Cytoskeleton | Up |
| actin-related protein 2/3 complex inhibitor(Arpin) | Cytoskeleton | Up |
| calponin 3, acidic(Cnn3) | Cytoskeleton | Up |
| capping protein (actin filament) muscle Z-line, alpha 1(Capza1) | Cytoskeleton | Up |
| capping protein (actin filament), gelsolin-like(Capg) | Cytoskeleton | Up |
| chaperonin containing Tcp1, subunit 3 (gamma)(Cct3) | Cytoskeleton | Up |
| coronin, actin binding protein 1C(Coro1c) | Cytoskeleton | Up |
| cortactin(Cttn) | Cytoskeleton | Up |
| Cytoskeleton-associated protein 4(Ckap4) | Cytoskeleton | Up |
| destrin(Dstn) | Cytoskeleton | Up |
| drebrin-like(Dbnl) | Cytoskeleton | Up |
| filamin, beta(Flnb) | Cytoskeleton | Up |
| microtubule-associated protein, RP/EB family, member 1(Mapre1) | Cytoskeleton | Up |
| mitotic spindle positioning(Misp) | Cytoskeleton | Up |
| plakophilin 3(Pkp3) | Cytoskeleton | Up |
| scinderin(Scin) | Cytoskeleton | Up |
| sorbin and SH3 domain containing 2(Sorbs2) | Cytoskeleton | Up |
| sperm antigen with calponin homology and coiled-coil domains 1(Specc1) | Cytoskeleton | Up |
| striatin interacting protein 1(Strip1) | Cytoskeleton | Up |
| thymosin, beta 10(Tmsb10) | Cytoskeleton | Up |
| transgelin(Tagln) | Cytoskeleton | Up |
| tropomyosin 3, gamma(Tpm3) | Cytoskeleton | Up |
| tubulin tyrosine ligase-like family, member 12(Ttll12) | Cytoskeleton | Up |
| kinesin family member C2(Kifc2) | Cytoskeleton | Down |
| smoothelin(Smtn) | Cytoskeleton | Down |
| metastasis suppressor 1(Mtss1) | Cytoskeleton | Down |
| FYVE, RhoGEF and PH domain containing 4(Fgd4) | Cytoskeleton | Down |
| FYVE, RhoGEF and PH domain containing 4(Fgd4) | Cytoskeleton | Down |
| influenza virus NS1A binding protein(Ivns1abp) | Cytoskeleton | Down |
| Rho guanine nucleotide exchange factor (GEF) 26(Arhgef26) | Cytoskeleton | Down |
| ral guanine nucleotide dissociation stimulator-like 2(Rgl2) | Cytoskeleton | Down |
| inturned planar cell polarity protein(Intu) | Cytoskeleton | Down |
| WAS/WASL interacting protein family, member 1(Wipf1) | Cytoskeleton | Down |
| formin binding protein 1(Fnbp1) | Cytoskeleton | Down |
| glutathione S-transferase, alpha 4(Gsta4) | Detox | Up |
| glutathione S-transferase, mu 1(Gstm1) | Detox | Up |
| glutathione peroxidase 1(Gpx1) | Detox | Up |
| glutathione peroxidase 2(Gpx2) | Detox | Up |
| hemopexin(Hpx) | Detox | Up |
| lipoyl(octanoyl) transferase 2 (putative)(Lipt2) | Detox | Up |
| nudix (nucleoside diphosphate linked moiety X)-type motif 1(Nudt1) | Detox | Up |
| peroxiredoxin 1(Prdx1) | Detox | Up |
| selenoprotein W, muscle 1(Sepw1) | Detox | Up |
| solute carrier family 25 (mitochondrial carrier, phosphate carrier), member 24(Slc25a24) | Detox | Up |
| spermine oxidase(Smox) | Detox | Up |
| neuronatin(Nnat) | Development | Up |
| transmembrane protein 43(Tmem43) | Development | Up |
| Lix1-like(Lix1l) | Development | Up |
| Rho GTPase activating protein 8(Arhgap8) | Development | Up |
| Tax1 (human T cell leukemia virus type I) binding protein 3(Tax1bp3) | Development | Up |
| agrin(Agrn) | Development | Up |
| axin interactor, dorsalization associated(Aida) | Development | Up |
| family with sequence similarity 83, member F(Fam83f) | Development | Up |
| integrin alpha 7(Itga7) | Development | Up |
| leucine-rich repeat LGI family, member 2(Lgi2) | Development | Up |
| mab-21-like 3 (C. elegans)(Mab21l3) | Development | Up |
| protein O-glucosyltransferase 1(Poglut1) | Development | Up |
| taperin(Tprn) | Development | Up |
| thioredoxin domain containing 9(Txndc9) | Development | Up |
| von Willebrand factor A domain containing 5A(Vwa5a) | Development | Up |
| CD34 antigen(Cd34) | Development | Down |
| plexin domain containing 1(Plxdc1) | Development | Down |
| homeobox D8(Hoxd8) | Development | Down |
| matrix-remodelling associated 8(Mxra8) | Development | Down |
| chordin-like 2(Chrdl2) | Development | Down |
| cAMP responsive element binding protein 3-like 2(Creb3l2) | Development | Down |
| cAMP responsive element binding protein 3-like 2(Creb3l2) | Development | Down |
| SRY (sex determining region Y)-box 5(Sox5) | Development | Down |
| homeobox D9(Hoxd9) | Development | Down |
| catsper channel auxiliary subunit gamma 1(Catsperg1) | Development | Down |
| glypican 3(Gpc3) | Development | Down |
| retinitis pigmentosa GTPase regulator interacting protein 1(Rpgrip1) | Development | Down |
| von Willebrand factor A domain containing 8(Vwa8) | Development | Down |
| FXYD domain-containing ion transport regulator 2(Fxyd2) | Development | Down |
| tetratricopeptide repeat domain 9(Ttc9) | Development | Up |
| Kruppel-like factor 15(Klf15) | Development | Down |
| Fanconi anemia, complementation group C(Fancc) | DNA repair | Up |
| excision repair cross-complementing rodent repair deficiency, complementation group 1(Ercc1) | DNA repair | Up |
| uracil DNA glycosylase(Ung) | DNA repair | Down |
| NEDD4 binding protein 2(N4bp2) | DNA repair | Down |
| family with sequence similarity 102, member A(Fam102a) | Estrogen | Up |
| ATPase family, AAA domain containing 2(Atad2) | Estrogen | Down |
| papilin, proteoglycan-like sulfated glycoprotein(Papln) | Extracellular matrix | Down |
| tissue inhibitor of metalloproteinase 4(Timp4) | Extracellular matrix | Down |
| laminin, alpha 1(Lama1) | Extracellular matrix | Down |
| UDP-N-acetyl-alpha-D-galactosamine:polypeptide N-acetylgalactosaminyltransferase 15(Galnt15) | Glycosylation | Down |
| fucose mutarotase(Fuom) | Glycosylation | Down |
| ST3 beta-galactoside alpha-2,3-sialyltransferase 3(St3gal3) | Glycosylation | Down |
| mannosyl-oligosaccharide glucosidase(Mogs) | Glycosylation | Down |
| GDP-mannose pyrophosphorylase A(Gmppa) | Glycosylation | Down |
| fucosyltransferase 4(Fut4) | Glycosylation | Down |
| ST6 (alpha-N-acetyl-neuraminyl-2,3-beta-galactosyl-1,3)-N-acetylgalactosaminide alpha-2,6-sialyltransferase 2(St6galnac2) | Glycosylation | Down |
| beta-3-glucosyltransferase(B3glct) | Glycosylation | Up |
| poly (ADP-ribose) polymerase family, member 8(Parp8) | Glycosylation | Up |
| glucosaminyl (N-acetyl) transferase 2, I-branching enzyme(Gcnt2) | Glycosylation | Up |
| poly (ADP-ribose) polymerase family, member 12(Parp12) | Glycosylation | Up |
| poly (ADP-ribose) polymerase family, member 9(Parp9) | Glycosylation | Up |
| cysteine and glycine-rich protein 1(Csrp1) | Growth | Up |
| cysteine rich protein 2(Crip2) | Growth | Up |
| ADP-ribosylation factor-like 4A(Arl4a) | Growth | Up |
| betacellulin, epidermal Growth factor family member(Btc) | Growth | Up |
| tetraspanin 9(Tspan9) | Growth | Up |
| phospholipid phosphatase 2(Plpp2) | Growth | Up |
| transmembrane 4 superfamily member 1(Tm4sf1) | Growth | Up |
| leucine rich repeat and fibronectin type III domain containing 4(Lrfn4) | Growth | Up |
| CD151 antigen(Cd151) | Growth | Up |
| PTK7 protein tyrosine kinase 7(Ptk7) | Growth | Up |
| tumor-associated calcium signal transducer 2(Tacstd2) | Growth | Up |
| trophoblast glycoprotein(Tpbg) | Growth | Up |
| ArfGAP with SH3 domain, ankyrin repeat and PH domain 3(Asap3) | Growth | Up |
| B cell CLL/lymphoma 9(Bcl9) | Growth | Up |
| Eph receptor A2(Epha2) | Growth | Up |
| FBJ osteosarcoma oncogene B(Fosb) | Growth | Up |
| cyclin G1(Ccng1) | Growth | Up |
| hepatoma-derived Growth factor(Hdgf) | Growth | Up |
| immediate early response 5-like(Ier5l) | Growth | Up |
| kit oncogene(Kit) | Growth | Up |
| polo-like kinase 2(Plk2) | Growth | Up |
| potassium channel tetramerisation domain containing 1(Kctd1) | Growth | Up |
| tissue inhibitor of metalloproteinase 1(Timp1) | Growth | Up |
| transforming Growth factor beta regulated gene 1(Tbrg1) | Growth | Up |
| v-ral simian leukemia viral oncogene B(Ralb) | Growth | Up |
| phosphoinositide-3-kinase, regulatory subunit 5, p101(Pik3r5) | Growth | Up |
| transmembrane protein 184C(Tmem184c) | Growth | Up |
| retinoblastoma binding protein 7(Rbbp7) | Growth | Up |
| spermidine synthase(Srm) | Growth | Down |
| insulin-like Growth factor binding protein 3(Igfbp3) | Growth | Down |
| tetraspanin 13(Tspan13) | Growth | Down |
| family with sequence similarity 20, member A(Fam20a) | Growth | Down |
| nucleolar protein 8(Nol8) | Growth | Down |
| mitogen-activated protein kinase kinase kinase 1(Map3k1) | Growth | Down |
| insulin-like Growth factor binding protein 6(Igfbp6) | Growth | Down |
| peptidase inhibitor 16(Pi16) | Growth | Down |
| epidermal Growth factor(Egf) | Growth | Down |
| SPARC-like 1(Sparcl1) | Growth | Down |
| pleckstrin homology domain containing, family B (evectins) member 1(Plekhb1) | Growth | Down |
| pleckstrin homology domain containing, family B (evectins) member 1(Plekhb1) | Growth | Down |
| eukaryotic elongation factor-2 kinase(Eef2k) | Growth | Down |
| WNK lysine deficient protein kinase 4(Wnk4) | Growth | Down |
| insulin-like Growth factor binding protein, acid labile subunit(Igfals) | Growth | Down |
| neuroepithelial cell transforming gene 1(Net1) | Growth | Down |
| TraB domain containing(Trabd) | Homeostasis | Down |
| claudin 10(Cldn10) | Homeostasis | Down |
| transmembrane protein 56(Tmem56) | Homeostasis | Down |
| angiotensinogen (serpin peptidase inhibitor, clade A, member 8)(Agt) | Homeostasis | Down |
| Usher syndrome 1C binding protein 1(Ushbp1) | Homeostasis | Down |
| protein phosphatase 2, regulatory subunit B'', alpha(Ppp2r3a) | Homeostasis | Down |
| transmembrane channel-like gene family 8(Tmc8) | Homeostasis | Down |
| R3H domain containing 1(R3hdm1) | Gormone | Down |
| lectin, galactoside-binding, soluble, 3 binding protein(Lgals3bp) | Immune | Up |
| interferon induced protein with tetratricopeptide repeats 1B like 2(Ifit1bl2) | Immune | Up |
| interferon-induced protein with tetratricopeptide repeats 3(Ifit3) | Immune | Up |
| interferon-induced protein with tetratricopeptide repeats 2(Ifit2) | Immune | Up |
| interferon-induced protein with tetratricopeptide repeats 1(Ifit1) | Immune | Up |
| interferon induced protein with tetratricpeptide repeats 1B like 1(Ifit1bl1) | Immune | Up |
| interferon-induced protein with tetratricopeptide repeats 3B(Ifit3b) | Immune | Up |
| chemokine (C-C motif) ligand 7(Ccl7) | Immune | Up |
| chemokine (C-C motif) ligand 5(Ccl5) | Immune | Up |
| chemokine (C-C motif) ligand 4(Ccl4) | Immune | Up |
| chemokine (C-C motif) ligand 3(Ccl3) | Immune | Up |
| chemokine (C-X-C motif) ligand 11(Cxcl11) | Immune | Up |
| chemokine (C-C motif) ligand 20(Ccl20) | Immune | Up |
| chemokine (C-C motif) ligand 2(Ccl2) | Immune | Up |
| chemokine (C-C motif) ligand 11(Ccl11) | Immune | Up |
| chemokine (C-X3-C motif) ligand 1(Cx3cl1) | Immune | Up |
| chemokine (C-X-C motif) ligand 3(Cxcl3) | Immune | Up |
| chemokine (C-X-C motif) ligand 5(Cxcl5) | Immune | Up |
| chemokine (C-X-C motif) ligand 15(Cxcl15) | Immune | Up |
| interferon induced transmembrane protein 3(Ifitm3) | Immune | Up |
| bone marrow stromal cell antigen 2(Bst2) | Immune | Up |
| interferon induced transmembrane protein 1(Ifitm1) | Immune | Up |
| interferon induced transmembrane protein 2(Ifitm2) | Immune | Up |
| 2'-5' oligoadenylate synthetase 2(Oas2) | Immune | Up |
| interferon induced with helicase C domain 1(Ifih1) | Immune | Up |
| 2'-5' oligoadenylate synthetase 3(Oas3) | Immune | Up |
| 2'-5' oligoadenylate synthetase-like 1(Oasl1) | Immune | Up |
| 2'-5' oligoadenylate synthetase-like 2(Oasl2) | Immune | Up |
| 2'-5' oligoadenylate synthetase 1G(Oas1g) | Immune | Up |
| 2'-5' oligoadenylate synthetase 1A(Oas1a) | Immune | Up |
| DEXH (Asp-Glu-X-His) box polypeptide 58(Dhx58) | Immune | Up |
| predicted gene 4951(Gm4951) | Immune | Up |
| interferon gamma induced GTPase(Igtp) | Immune | Up |
| interferon gamma inducible protein 47(Ifi47) | Immune | Up |
| immunity-related GTPase family M member 2(Irgm2) | Immune | Up |
| TRAF type zinc finger domain containing 1(Trafd1) | Immune | Up |
| guanylate binding protein 3(Gbp3) | Immune | Up |
| immunity-related GTPase family M member 1(Irgm1) | Immune | Up |
| guanylate binding protein 11(Gbp11) | Immune | Up |
| guanylate binding protein 2(Gbp2) | Immune | Up |
| guanylate binding protein 2b(Gbp2b) | Immune | Up |
| guanylate binding protein 7(Gbp7) | Immune | Up |
| predicted gene 5416(Gm5416) | Immune | Up |
| stefin A3(Stfa3) | Immune | Up |
| cDNA sequence BC1179090(BC117090) | Immune | Up |
| cDNA sequence BC100530(BC100530) | Immune | Up |
| cystatin B(Cstb) | Immune | Up |
| stefin A2 like 1(Stfa2l1) | Immune | Up |
| predicted gene 5483(Gm5483) | Immune | Up |
| leukocyte immunoglobulin-like receptor, subfamily B, member 4A(Lilrb4a) | Immune | Up |
| histocompatibility 2, T region locus 10(H2-T10) | Immune | Up |
| histocompatibility 2, Q region locus 6(H2-Q6) | Immune | Up |
| histocompatibility 2, D region locus 1(H2-D1) | Immune | Up |
| histocompatibility 2, T region locus 22(H2-T22) | Immune | Up |
| histocompatibility 2, K1, K region(H2-K1) | Immune | Up |
| CD80 antigen(Cd80) | Immune | Up |
| colony stimulating factor 3 receptor (granulocyte)(Csf3r) | Immune | Up |
| CD47 antigen (Rh-related antigen, integrin-associated signal transducer)(Cd47) | Immune | Up |
| paired immunoglobin-like type 2 receptor beta 1(Pilrb1) | Immune | Up |
| CD300 molecule like family member F(Cd300lf) | Immune | Up |
| fibronectin type III domain containing 4(Fndc4) | Immune | Up |
| chemokine (C-C motif) receptor 1(Ccr1) | Immune | Up |
| chemokine (C-X-C motif) receptor 2(Cxcr2) | Immune | Up |
| triggering receptor expressed on myeloid cells 3(Trem3) | Immune | Up |
| triggering receptor expressed on myeloid cells 1(Trem1) | Immune | Up |
| interleukin 17 receptor C(Il17rc) | Immune | Up |
| bone marrow stromal cell antigen 1(Bst1) | Immune | Up |
| chemokine (C-C motif) receptor-like 2(Ccrl2) | Immune | Up |
| secreted and transmembrane 1B(Sectm1b) | Immune | Up |
| interleukin 1 receptor, type II(Il1r2) | Immune | Up |
| interleukin 1 receptor, type I(Il1r1) | Immune | Up |
| paired immunoglobin-like type 2 receptor beta 2(Pilrb2) | Immune | Up |
| dermatan sulfate epimerase(Dse) | Immune | Up |
| CKLF-like MARVEL transmembrane domain containing 3(Cmtm3) | Immune | Up |
| paired immunoglobin-like type 2 receptor alpha(Pilra) | Immune | Up |
| interleukin 13 receptor, alpha 2(Il13ra2) | Immune | Up |
| interleukin 13 receptor, alpha 1(Il13ra1) | Immune | Up |
| myeloid-associated differentiation marker(Myadm) | Immune | Up |
| CD80 antigen(Cd80) | Immune | Up |
| CD63 antigen(Cd63) | Immune | Up |
| selectin, endothelial cell(Sele) | Immune | Up |
| C-type lectin domain family 4, member d(Clec4d) | Immune | Up |
| C-type lectin domain family 4, member e(Clec4e) | Immune | Up |
| oncostatin M receptor(Osmr) | Immune | Up |
| CD33 antigen(Cd33) | Immune | Up |
| lymphocyte antigen 6 complex, locus E(Ly6e) | Immune | Up |
| myelin protein zero-like 2(Mpzl2) | Immune | Up |
| secreted and transmembrane 1A(Sectm1a) | Immune | Up |
| lymphocyte antigen 6 complex, locus A(Ly6a) | Immune | Up |
| complement component 5a receptor 1(C5ar1) | Immune | Up |
| mast cell expressed membrane protein 1(Mcemp1) | Immune | Up |
| interferon induced transmembrane protein 6(Ifitm6) | Immune | Up |
| transmembrane protein 106A(Tmem106a) | Immune | Up |
| triggering receptor expressed on myeloid cells-like 4(Treml4) | Immune | Up |
| bone marrow stromal cell antigen 2(Bst2) | Immune | Up |
| leukocyte immunoglobulin-like receptor, subfamily B, member 4A(Lilrb4a) | Immune | Up |
| leukocyte immunoglobulin-like receptor, subfamily B, member 4B(Lilr4b) | Immune | Up |
| chemokine (C-X-C motif) ligand 16(Cxcl16) | Immune | Up |
| leukocyte immunoglobulin-like receptor, subfamily A (with TM domain), member 6(Lilra6) | Immune | Up |
| ST3 beta-galactoside alpha-2,3-sialyltransferase 4(St3gal4) | Immune | Up |
| nectin cell adhesion molecule 2(Nectin2) | Immune | Up |
| suppressor of cytokine signaling 1(Socs1) | Immune | Up |
| suppressor of cytokine signaling 3(Socs3) | Immune | Up |
| suppressor of cytokine signaling 2(Socs2) | Immune | Up |
| suppressor of cytokine signaling 5(Socs5) | Immune | Up |
| CD209c antigen(Cd209c) | Immune | Up |
| DEAD (Asp-Glu-Ala-Asp) box polypeptide 60(Ddx60) | Immune | Up |
| FERM domain containing 8(Frmd8) | Immune | Up |
| FGR proto-oncogene, Src family tyrosine kinase(Fgr) | Immune | Up |
| ISG15 ubiquitin-like modifier(Isg15) | Immune | Up |
| MX dynamin-like GTPase 1(Mx1) | Immune | Up |
| MX dynamin-like GTPase 2(Mx2) | Immune | Up |
| Mediterranean fever(Mefv) | Immune | Up |
| N-myc (and STAT) interactor(Nmi) | Immune | Up |
| NLR family, pyrin domain containing 3(Nlrp3) | Immune | Up |
| RNA binding motif protein 43(Rbm43) | Immune | Up |
| WAP four-disulfide core domain 17(Wfdc17) | Immune | Up |
| WAP four-disulfide core domain 21(Wfdc21) | Immune | Up |
| Z-DNA binding protein 1(Zbp1) | Immune | Up |
| aconitate decarboxylase 1(Acod1) | Immune | Up |
| annexin A1(Anxa1) | Immune | Up |
| annexin A3(Anxa3) | Immune | Up |
| chitinase-like 3(Chil3) | Immune | Up |
| colony stimulating factor 1 (macrophage)(Csf1) | Immune | Up |
| colony stimulating factor 3 (granulocyte)(Csf3) | Immune | Up |
| eukaryotic translation initiation factor 2-alpha kinase 2(Eif2ak2) | Immune | Up |
| gamma-secretase activating protein(Gsap) | Immune | Up |
| heat shock protein 90, alpha (cytosolic), class A member 1(Hsp90aa1) | Immune | Up |
| hemolytic complement(Hc) | Immune | Up |
| heterogeneous nuclear ribonucleoprotein L-like(Hnrnpll) | Immune | Up |
| intercellular adhesion molecule 1(Icam1) | Immune | Up |
| interferon activated gene 202B(Ifi202b) | Immune | Up |
| interferon activated gene 204(Ifi204) | Immune | Up |
| interferon regulatory factor 1(Irf1) | Immune | Up |
| interferon regulatory factor 7(Irf7) | Immune | Up |
| interferon-induced protein 35(Ifi35) | Immune | Up |
| interferon-induced protein 44 like(Ifi44l) | Immune | Up |
| interferon-induced protein 44(Ifi44) | Immune | Up |
| interleukin 1 alpha(Il1a) | Immune | Up |
| interleukin 1 beta(Il1b) | Immune | Up |
| interleukin 1 family, member 6(Il1f6) | Immune | Up |
| interleukin 1 receptor antagonist(Il1rn) | Immune | Up |
| interleukin 6(Il6) | Immune | Up |
| interleukin-1 receptor-associated kinase 3(Irak3) | Immune | Up |
| kallikrein related-peptidase 10(Klk10) | Immune | Up |
| lectin, galactose binding, soluble 3(Lgals3) | Immune | Up |
| lectin, galactose binding, soluble 9(Lgals9) | Immune | Up |
| macrophage migration inhibitory factor(Mif) | Immune | Up |
| nuclear antigen Sp100(Sp100) | Immune | Up |
| oncostatin M(Osm) | Immune | Up |
| pentraxin related gene(Ptx3) | Immune | Up |
| peptidoglycan recognition protein 1(Pglyrp1) | Immune | Up |
| pleckstrin homology domain containing, family S member 1(Plekhs1) | Immune | Up |
| prostaglandin E synthase 2(Ptges2) | Immune | Up |
| prostaglandin-endoperoxide synthase 2(Ptgs2) | Immune | Up |
| protein phosphatase 1, regulatory (inhibitor) subunit 14B(Ppp1r14b) | Immune | Up |
| purine-nucleoside phosphorylase(Pnp) | Immune | Up |
| radical S-adenosyl methionine domain containing 2(Rsad2) | Immune | Up |
| resistin like gamma(Retnlg) | Immune | Up |
| reticuloendotheliosis oncogene(Rel) | Immune | Up |
| retinoic acid receptor responder (tazarotene induced) 2(Rarres2) | Immune | Up |
| schlafen 2(Slfn2) | Immune | Up |
| schlafen 4(Slfn4) | Immune | Up |
| secretory leukocyte peptidase inhibitor(Slpi) | Immune | Up |
| serine (or cysteine) peptidase inhibitor, clade B, member 2(Serpinb2) | Immune | Up |
| signal peptide peptidase like 2A(Sppl2a) | Immune | Up |
| sphingosine kinase 1(Sphk1) | Immune | Up |
| tachykinin 1(Tac1) | Immune | Up |
| transporter 1, ATP-binding cassette, sub-family B (MDR/TAP)(Tap1) | Immune | Up |
| transporter 2, ATP-binding cassette, sub-family B (MDR/TAP)(Tap2) | Immune | Up |
| tumor necrosis factor, alpha-induced protein 2(Tnfaip2) | Immune | Up |
| ubiquitin specific peptidase 18(Usp18) | Immune | Up |
| ubiquitin-conjugating enzyme E2F (putative)(Ube2f) | Immune | Up |
| cathepsin E(Ctse) | Immune | Down |
| cytokine receptor-like factor 1(Crlf1) | Immune | Down |
| lactoperoxidase(Lpo) | Immune | Down |
| tumor necrosis factor receptor superfamily, member 13b(Tnfrsf13b) | Immune | Down |
| seminal vesicle antigen-like 2(Sval2) | Immune | Down |
| Fc receptor-like S, scavenger receptor(Fcrls) | Immune | Down |
| lipopolysaccharide binding protein(Lbp) | Immune | Down |
| chemokine (C-C motif) ligand 6(Ccl6) | Immune | Down |
| tandem C2 domains, nuclear(Tc2n) | Immune | Down |
| colony stimulating factor 1 receptor(Csf1r) | Immune | Down |
| colony stimulating factor 1 receptor(Csf1r) | Immune | Down |
| complement component factor h(Cfh) | Immune | Down |
| SLAM family member 9(Slamf9) | Immune | Down |
| interleukin 6 receptor, alpha(Il6ra) | Immune | Down |
| orosomucoid 3(Orm3) | Immune | Down |
| Rac/Cdc42 guanine nucleotide exchange factor (GEF) 6(Arhgef6) | Immune | Down |
| interferon gamma inducible protein 30(Ifi30) | Immune | Down |
| ubiquitin-like modifier activating enzyme 5(Uba5) | Immune | Down |
| fibrinogen gamma chain(Fgg) | Immune | Down |
| CD207 antigen(Cd207) | Immune | Down |
| butyrophilin-like 9(Btnl9) | Immune | Down |
| lectin, galactoside binding-like(Lgalsl) | Immune | Down |
| TRAF-interacting protein with forkhead-associated domain, family member B(Tifab) | Immune | Down |
| F-box and leucine-rich repeat protein 22(Fbxl22) | Immune | Down |
| C-type lectin domain family 12, member a(Clec12a) | Immune | Down |
| leukemia inhibitory factor receptor(Lifr) | Immune | Down |
| chemokine (C-X-C motif) ligand 17(Cxcl17) | Immune | Down |
| resistin like alpha(Retnla) | Immune | Down |
| orosomucoid 2(Orm2) | Immune | Down |
| ribonuclease L (2', 5'-oligoisoadenylate synthetase-dependent)(Rnasel) | Immune | Down |
| complement component 4B (Chido blood group)(C4b) | Immune | Down |
| CD209g antigen(Cd209g) | Immune | Down |
| complement component 1, s subcomponent 2(C1s2) | Immune | Down |
| Ral GTPase activating protein, alpha subunit 1(Ralgapa1) | Immune | Down |
| lysozyme 1(Lyz1) | Immune | Down |
| VCP-interacting membrane protein(Vimp) | Immune | Down |
| FK506 binding protein 11(Fkbp11) | Immune | Down |
| secreted phosphoprotein 1(Spp1) | Immune | Down |
| CD209f antigen(Cd209f) | Immune | Down |
| chemokine (C-X3-C motif) receptor 1(Cx3cr1) | Immune | Down |
| zinc and ring finger 2(Znrf2) | Immune | Down |
| ATPase, class V, type 10B(Atp10b) | Lipids regulation | Up |
| delta(4)-desaturase, sphingolipid 1(Degs1) | Lipids regulation | Up |
| methylsterol monoxygenase 1(Msmo1) | Lipids regulation | Up |
| farnesyl diphosphate farnesyl transferase 1(Fdft1) | Lipids regulation | Up |
| cytochrome P450, family 7, subfamily b, polypeptide 1(Cyp7b1) | Lipids regulation | Up |
| hydroxysteroid (17-beta) dehydrogenase 7(Hsd17b7) | Lipids regulation | Up |
| cytochrome P450, family 51(Cyp51) | Lipids regulation | Up |
| 24-dehydrocholesterol reductase(Dhcr24) | Lipids regulation | Up |
| sterol-C5-desaturase(Sc5d) | Lipids regulation | Up |
| NAD(P) dependent steroid dehydrogenase-like(Nsdhl) | Lipids regulation | Up |
| abhydrolase domain containing 6(Abhd6) | Lipids regulation | Up |
| emopamil binding protein-like(Ebpl) | Lipids regulation | Up |
| transmembrane protein 41B(Tmem41b) | Lipids regulation | Up |
| G protein-coupled receptor 84(Gpr84) | Lipids regulation | Up |
| phospholipid scramblase 2(Plscr2) | Lipids regulation | Up |
| alkaline ceramidase 3(Acer3) | Lipids regulation | Up |
| phospholipid phosphatase 1(Plpp1) | Lipids regulation | Up |
| hydroxycarboxylic acid receptor 2(Hcar2) | Lipids regulation | Up |
| torsin A interacting protein 1(Tor1aip1) | Lipids regulation | Up |
| sphingomyelin phosphodiesterase, acid-like 3B(Smpdl3b) | Lipids regulation | Up |
| hydroxysteroid (17-beta) dehydrogenase 7(Hsd17b7) | Lipids regulation | Up |
| 3-hydroxyacyl-CoA dehydratase 3(Hacd3) | Lipids regulation | Up |
| CDP-diacylglycerol synthase (phosphatidate cytidylyltransferase) 2(Cds2) | Lipids regulation | Up |
| StAR-related lipid transfer (START) domain containing 4(Stard4) | Lipids regulation | Up |
| acyl-CoA synthetase long-chain family member 5(Acsl5) | Lipids regulation | Up |
| acyl-CoA thioesterase 7(Acot7) | Lipids regulation | Up |
| acyl-CoA thioesterase 9(Acot9) | Lipids regulation | Up |
| acyl-Coenzyme A dehydrogenase, long-chain(Acadl) | Lipids regulation | Up |
| alkylglycerone phosphate synthase(Agps) | Lipids regulation | Up |
| apolipoprotein B receptor(Apobr) | Lipids regulation | Up |
| apolipoprotein L 9a(Apol9a) | Lipids regulation | Up |
| apolipoprotein L 9b(Apol9b) | Lipids regulation | Up |
| glycosylphosphatidylinositol specific phospholipase D1(Gpld1) | Lipids regulation | Up |
| myo-inositol 1-phosphate synthase A1(Isyna1) | Lipids regulation | Up |
| translocator protein(Tspo) | Lipids regulation | Up |
| GRAM domain containing 3(Gramd3) | Lipids regulation | Down |
| CD36 antigen(Cd36) | Lipids regulation | Down |
| acyl-CoA synthetase long-chain family member 1(Acsl1) | Lipids regulation | Down |
| dipeptidase 1 (renal)(Dpep1) | Lipids regulation | Down |
| cytochrome P450, family 39, subfamily a, polypeptide 1(Cyp39a1) | Lipids regulation | Down |
| cytochrome P450, family 2, subfamily e, polypeptide 1(Cyp2e1) | Lipids regulation | Down |
| cytochrome P450, family 27, subfamily a, polypeptide 1(Cyp27a1) | Lipids regulation | Down |
| oleoyl-ACP hydrolase(Olah) | Lipids regulation | Down |
| fatty acid binding protein 3, muscle and heart(Fabp3) | Lipids regulation | Down |
| acyl-Coenzyme A oxidase 3, pristanoyl(Acox3) | Lipids regulation | Down |
| high density lipoprotein (HDL) binding protein(Hdlbp) | Lipids regulation | Down |
| stearoyl-Coenzyme A desaturase 1(Scd1) | Lipids regulation | Down |
| ORM1-like 3 (S. cerevisiae)(Ormdl3) | Lipids regulation | Down |
| enoyl Coenzyme A hydratase domain containing 3(Echdc3) | Lipids regulation | Down |
| fatty acid desaturase domain family, member 6(Fads6) | Lipids regulation | Down |
| phospholipase A2, group IVF(Pla2g4f) | Lipids regulation | Down |
| coatomer protein complex, subunit epsilon(Cope) | Lipids regulation | Down |
| phosphatidylinositol-specific phospholipase C, X domain containing 2(Plcxd2) | Lipids regulation | Down |
| carboxylesterase 1D(Ces1d) | liver enzyme | Down |
| leucine-zipper-like transcriptional regulator, 1(Lztr1) | Membrane/vesicles | Down |
| protein tyrosine phosphatase, receptor type, f polypeptide (PTPRF), interacting protein (liprin), alpha 4(Ppfia4) | Membrane/vesicles | Down |
| nucleoporin 210(Nup210) | Membrane/vesicles | Down |
| transmembrane protein 182(Tmem182) | Membrane/vesicles | Down |
| ATPase, H+ transporting, lysosomal V1 subunit C2(Atp6v1c2) | Membrane/vesicles | Up |
| carbonic anhydrase 4(Car4) | Membrane/vesicles | Up |
| ankyrin 2, brain(Ank2) | Membrane/vesicles | Up |
| copine II(Cpne2) | Membrane/vesicles | Up |
| epithelial membrane protein 2(Emp2) | Membrane/vesicles | Up |
| torsin A interacting protein 2(Tor1aip2) | Membrane/vesicles | Up |
| mannose-6-phosphate receptor, cation dependent(M6pr) | Membrane/vesicles | Up |
| ADP-ribosylation factor 2(Arf2) | Membrane/vesicles | Up |
| ALS2 C-terminal like(Als2cl) | Membrane/vesicles | Up |
| EH-domain containing 1(Ehd1) | Membrane/vesicles | Up |
| ankyrin repeat and FYVE domain containing 1(Ankfy1) | Membrane/vesicles | Up |
| clathrin, light polypeptide (Lcb)(Cltb) | Membrane/vesicles | Up |
| reticulon 4(Rtn4) | Membrane/vesicles | Up |
| sorting nexin 17(Snx17) | Membrane/vesicles | Up |
| sorting nexin 4(Snx4) | Membrane/vesicles | Up |
| torsin family 3, member A(Tor3a) | Membrane/vesicles | Up |
| voltage-dependent anion channel 3(Vdac3) | Membrane/vesicles | Up |
| glycine N-methyltransferase(Gnmt) | Metabolism | Down |
| inosine 5'-phosphate dehydrogenase 1(Impdh1) | Metabolism | Down |
| gamma-glutamyltransferase 1(Ggt1) | Metabolism | Down |
| NADPH dependent diflavin oxidoreductase 1(Ndor1) | Metabolism | Down |
| transmembrane protein 110(Tmem110) | Metabolism | Down |
| solute carrier family 5 (sodium-dependent vitamin transporter), member 6(Slc5a6) | Metabolism | Down |
| solute carrier family 44, member 4(Slc44a4) | Metabolism | Down |
| histidine ammonia lyase(Hal) | Metabolism | Down |
| solute carrier family 1 (glutamate/neutral amino acid transporter), member 4(Slc1a4) | Metabolism | Down |
| transcobalamin 2(Tcn2) | Metabolism | Down |
| L-2-hydroxyglutarate dehydrogenase(L2hgdh) | Metabolism | Down |
| L-2-hydroxyglutarate dehydrogenase(L2hgdh) | Metabolism | Down |
| aldehyde dehydrogenase family 6, subfamily A1(Aldh6a1) | Metabolism | Down |
| leishmanolysin-like (metallopeptidase M8 family)(Lmln) | Metabolism | Down |
| mitochondrial pyruvate carrier 1(Mpc1) | Metabolism | Down |
| proline-rich coiled-coil 1(Prrc1) | Metabolism | Down |
| glycine decarboxylase(Gldc) | Metabolism | Down |
| L-amino acid oxidase 1(Lao1) | Metabolism | Down |
| pyrroline-5-carboxylate reductase 1(Pycr1) | Metabolism | Down |
| glutamic-oxaloacetic transaminase 1, soluble(Got1) | Metabolism | Down |
| alcohol dehydrogenase, iron containing, 1(Adhfe1) | Metabolism | Down |
| solute carrier family 9 (sodium/hydrogen exchanger), member 4(Slc9a4) | Metabolism | Down |
| Ras-related GTP binding D(Rragd) | Metabolism | Down |
| aldehyde dehydrogenase 2, mitochondrial(Aldh2) | Metabolism | Down |
| glutamine fructose-6-phosphate transaminase 1(Gfpt1) | Metabolism | Down |
| FERM domain containing 4B(Frmd4b) | Metabolism | Down |
| ATPase, Ca++ transporting, plasma membrane 2(Atp2b2) | Metabolism | Down |
| tweety family member 1(Ttyh1) | Metabolism | Down |
| fumarylacetoacetate hydrolase(Fah) | Metabolism | Down |
| sulfotransferase family 1A, phenol-preferring, member 1(Sult1a1) | Metabolism | Down |
| lactate dehydrogenase D(Ldhd) | Metabolism | Down |
| folate receptor 2 (fetal)(Folr2) | Metabolism | Down |
| adipocyte plasma membrane associated protein(Apmap) | Metabolism | Down |
| dihydropyrimidine dehydrogenase(Dpyd) | Metabolism | Down |
| solute carrier family 26 (sulfate transporter), member 2(Slc26a2) | Metabolism | Down |
| SID1 transmembrane family, member 2(Sidt2) | Metabolism | Down |
| patatin-like phospholipase domain containing 7(Pnpla7) | Metabolism | Down |
| ATPase type 13A4(Atp13a4) | Metabolism | Down |
| kynurenine aminotransferase 1(Kyat1) | Metabolism | Down |
| solute carrier organic anion transporter family, member 4C1(Slco4c1) | Metabolism | Down |
| propionyl-Coenzyme A carboxylase, alpha polypeptide(Pcca) | Metabolism | Down |
| myosin VIIA and Rab interacting protein(Myrip) | Metabolism | Down |
| NHL repeat containing 3(Nhlrc3) | Metabolism | Down |
| fumarylacetoacetate hydrolase domain containing 1(Fahd1) | Metabolism | Down |
| glycerol-3-phosphate acyltransferase 2, mitochondrial(Gpat2) | Metabolism | Down |
| potassium inwardly-rectifying channel, subfamily K, member 6(Kcnk6) | Metabolism | Down |
| ERO1-like beta (S. cerevisiae)(Ero1lb) | Metabolism | Down |
| pyridine nucleotide-disulphide oxidoreductase domain 2(Pyroxd2) | Metabolism | Down |
| branched chain ketoacid dehydrogenase E1, alpha polypeptide(Bckdha) | Metabolism | Down |
| alcohol dehydrogenase 1 (class I)(Adh1) | Metabolism | Down |
| argininosuccinate synthetase 1(Ass1) | Metabolism | Down |
| methyltransferase like 21B(Mettl21b) | Metabolism | Down |
| isochorismatase domain containing 2a(Isoc2a) | Metabolism | Down |
| guanine nucleotide binding protein (G protein), beta 1(Gnb1) | Metabolism/Homeostasis | Up |
| guanine nucleotide binding protein (G protein), gamma 12(Gng12) | Metabolism/Homeostasis | Up |
| guanine nucleotide binding protein (G protein), gamma 5(Gng5) | Metabolism/Homeostasis | Up |
| ATPase, Na+/K+ transporting, beta 1 polypeptide(Atp1b1) | Metabolism/Homeostasis | Up |
| ATPase, Na+/K+ transporting, beta 3 polypeptide(Atp1b3) | Metabolism/Homeostasis | Up |
| solute carrier family 26, member 9(Slc26a9) | Metabolism/Homeostasis | Up |
| glycoprotein hormone beta 5(Gphb5) | Metabolism/Homeostasis | Up |
| protease-associated domain containing 1(Pradc1) | Metabolism/Homeostasis | Up |
| solute carrier family 2 (facilitated glucose transporter), member 6(Slc2a6) | Metabolism/Homeostasis | Up |
| G protein-coupled receptor 35(Gpr35) | Metabolism/Homeostasis | Up |
| vanin 3(Vnn3) | Metabolism/Homeostasis | Up |
| solute carrier family 16 (monocarboxylic acid transporters), member 3(Slc16a3) | Metabolism/Homeostasis | Up |
| STEAP family member 4(Steap4) | Metabolism/Homeostasis | Up |
| 5' nucleotidase, ecto(Nt5e) | Metabolism/Homeostasis | Up |
| solute carrier family 40 (iron-regulated transporter), member 1(Slc40a1) | Metabolism/Homeostasis | Up |
| UDP-glucuronate decarboxylase 1(Uxs1) | Metabolism/Homeostasis | Up |
| solute carrier family 5 (sodium/glucose cotransporter), member 9(Slc5a9) | Metabolism/Homeostasis | Up |
| tumor suppressor candidate 3(Tusc3) | Metabolism/Homeostasis | Up |
| solute carrier family 15 (H+/peptide transporter), member 2(Slc15a2) | Metabolism/Homeostasis | Up |
| solute carrier family 30 (zinc transporter), member 1(Slc30a1) | Metabolism/Homeostasis | Up |
| solute carrier family 6 (neurotransmitter transporter), member 14(Slc6a14) | Metabolism/Homeostasis | Up |
| solute carrier family 39 (zinc transporter), member 4(Slc39a4) | Metabolism/Homeostasis | Up |
| gamma-glutamyltransferase 5(Ggt5) | Metabolism/Homeostasis | Up |
| solute carrier family 35 (UDP-N-acetylglucosamine (UDP-GlcNAc) transporter), member 3(Slc35a3) | Metabolism/Homeostasis | Up |
| 3-hydroxy-3-methylglutaryl-Coenzyme A synthase 1(Hmgcs1) | Metabolism/Homeostasis | Up |
| adenosine monophosphate deaminase 2(Ampd2) | Metabolism/Homeostasis | Up |
| aldo-keto reductase family 1, member A1 (aldehyde reductase)(Akr1a1) | Metabolism/Homeostasis | Up |
| aminolevulinic acid synthase 1(Alas1) | Metabolism/Homeostasis | Up |
| annexin A2(Anxa2) | Metabolism/Homeostasis | Up |
| arginyl aminopeptidase (aminopeptidase B)(Rnpep) | Metabolism/Homeostasis | Up |
| carbonic anhydrase 13(Car13) | Metabolism/Homeostasis | Up |
| cytidine 5'-triphosphate synthase(Ctps) | Metabolism/Homeostasis | Up |
| cytidine monophosphate (UMP-CMP) kinase 2, mitochondrial(Cmpk2) | Metabolism/Homeostasis | Up |
| deiodinase, iodothyronine, type II(Dio2) | Metabolism/Homeostasis | Up |
| dual oxidase 2(Duox2) | Metabolism/Homeostasis | Up |
| esterase D/formylglutathione hydrolase(Esd) | Metabolism/Homeostasis | Up |
| glucan (1,4-alpha-), branching enzyme 1(Gbe1) | Metabolism/Homeostasis | Up |
| glycerophosphocholine phosphodiesterase 1(Gpcpd1) | Metabolism/Homeostasis | Up |
| histidine decarboxylase(Hdc) | Metabolism/Homeostasis | Up |
| inosine triphosphatase (nucleoside triphosphate pyrophosphatase)(Itpa) | Metabolism/Homeostasis | Up |
| isocitrate dehydrogenase 1 (NADP+), soluble(Idh1) | Metabolism/Homeostasis | Up |
| molybdenum cofactor synthesis 2(Mocs2) | Metabolism/Homeostasis | Up |
| ornithine decarboxylase antizyme 2(Oaz2) | Metabolism/Homeostasis | Up |
| ornithine decarboxylase, structural 1(Odc1) | Metabolism/Homeostasis | Up |
| prenyl (solanesyl) diphosphate synthase, subunit 1(Pdss1) | Metabolism/Homeostasis | Up |
| retinol binding protein 1, cellular(Rbp1) | Metabolism/Homeostasis | Up |
| ribulose-5-phosphate-3-epimerase(Rpe) | Metabolism/Homeostasis | Up |
| serum amyloid A 3(Saa3) | Metabolism/Homeostasis | Up |
| spermidine/spermine N1-acetyl transferase 1(Sat1) | Metabolism/Homeostasis | Up |
| succinate dehydrogenase complex assembly factor 2(Sdhaf2) | Metabolism/Homeostasis | Up |
| sulfatase modifying factor 2(Sumf2) | Metabolism/Homeostasis | Up |
| uridine phosphorylase 1(Upp1) | Metabolism/Homeostasis | Up |
| sideroflexin 3(Sfxn3) | Metabolism/Homeostasis | Up |
| RAB32, member RAS oncogene family(Rab32) | Metabolism/Homeostasis | Up |
| mitochondrial ribosomal protein L19(Mrpl19) | Metabolism/Homeostasis | Up |
| mitochondrial ribosomal protein L35(Mrpl35) | Metabolism/Homeostasis | Up |
| mitochondrial ribosomal protein L51(Mrpl51) | Metabolism/Homeostasis | Up |
| polyribonucleotide nucleotidyltransferase 1(Pnpt1) | Metabolism/Homeostasis | Up |
| solute carrier family 25 (mitochondrial carrier, adenine nucleotide translocator), member 4(Slc25a4) | Metabolism/Homeostasis | Up |
| sulfide quinone reductase-like (yeast)(Sqrdl) | Metabolism/Homeostasis | Up |
| uncoupling protein 2 (mitochondrial, proton carrier)(Ucp2) | Metabolism/Homeostasis | Up |
| urate (5-hydroxyiso-) hydrolase(Urah) | Metabolism/Homeostasis | Up |
| butyrophilin, subfamily 1, member A1(Btn1a1) | Milk content | Down |
| casein kappa(Csn3) | Milk content | Down |
| HtrA serine peptidase 3(Htra3) | Milk content | Down |
| casein beta(Csn2) | Milk content | Down |
| aldehyde dehydrogenase 1 family, member L2(Aldh1l2) | Mitochondria | Down |
| EF hand domain containing 1(Efhd1) | Mitochondria | Down |
| propionyl Coenzyme A carboxylase, beta polypeptide(Pccb) | Mitochondria | Down |
| small integral membrane protein 3(Smim3) | Nervous system | Up |
| 5 hydroxytryptamine (serotonin) receptor 4(Htr4) | Nervous system | Up |
| glial cell line derived neurotrophic factor family receptor alpha 1(Gfra1) | Nervous system | Up |
| netrin G2(Ntng2) | Nervous system | Up |
| pannexin 1(Panx1) | Nervous system | Up |
| SH3-binding kinase 1(Sbk1) | Nervous system | Up |
| aldhehyde dehydrogenase family 5, subfamily A1(Aldh5a1) | Nervous system | Up |
| guanine nucleotide binding protein (G protein), alpha inhibiting 2(Gnai2) | Nervous system | Up |
| hippocalcin-like 1(Hpcal1) | Nervous system | Up |
| myosin IB(Myo1b) | Nervous system | Up |
| netrin 1(Ntn1) | Nervous system | Up |
| neurturin(Nrtn) | Nervous system | Up |
| phosphodiesterase 7B(Pde7b) | Nervous system | Up |
| pleckstrin homology like domain, family B, member 2(Phldb2) | Nervous system | Up |
| prokineticin 2(Prok2) | Nervous system | Up |
| protease, serine 12 neurotrypsin (motopsin)(Prss12) | Nervous system | Up |
| regulator of calcineurin 1(Rcan1) | Nervous system | Up |
| thrombospondin 4(Thbs4) | Nervous system | Up |
| receptor transporter protein 4(Rtp4) | Nervous system | Up |
| olfactory receptor 56(Olfr56) | Nervous system | Up |
| RUN domain containing 3A(Rundc3a) | Nervous system | Down |
| glial cell line derived neurotrophic factor family receptor alpha 2(Gfra2) | Nervous system | Down |
| sema domain, transmembrane domain (TM), and cytoplasmic domain, (semaphorin) 6D(Sema6d) | Nervous system | Down |
| neurochondrin(Ncdn) | Nervous system | Down |
| family with sequence similarity 114, member A1(Fam114a1) | Nervous system | Down |
| basic helix-loop-helix family, member e40(Bhlhe40) | Nervous system | Down |
| SLIT-ROBO Rho GTPase activating protein 3(Srgap3) | Nervous system | Down |
| cadherin 13(Cdh13) | Nervous system | Down |
| myelin regulatory factor(Myrf) | Nervous system | Down |
| tubby like protein 1(Tulp1) | Nervous system | Down |
| piezo-type mechanosensitive ion channel component 2(Piezo2) | Nervous system | Down |
| coronin, actin binding protein, 2B(Coro2b) | Nervous system | Down |
| coronin, actin binding protein, 2B(Coro2b) | Nervous system | Down |
| potassium inwardly-rectifying channel, subfamily J, member 10(Kcnj10) | Nervous system | Down |
| shisa family member 7(Shisa7) | Nervous system | Down |
| TMF1-regulated nuclear protein 1(Trnp1) | Nervous system | Down |
| adhesion G protein-coupled receptor V1(Adgrv1) | Nervous system | Down |
| cDNA sequence BC006965(BC006965) | Non-coding | Up |
| predicted gene 8439(Gm8439) | Non-coding | Up |
| RIKEN cDNA 9530068E07 gene(9530068E07Rik) | Non-coding | Up |
| RIKEN cDNA A530064D06 gene(A530064D06Rik) | Non-coding | Up |
| RIKEN cDNA B430306N03 gene(B430306N03Rik) | Non-coding | Up |
| RIKEN cDNA F630028O10 gene(F630028O10Rik) | Non-coding | Up |
| RIKEN cDNA 1700011B04 gene(1700011B04Rik) | Non-coding | Up |
| RIKEN cDNA 2010111I01 gene(2010111I01Rik) | Non-coding | Up |
| RIKEN cDNA 2010300C02 gene(2010300C02Rik) | Non-coding | Up |
| RIKEN cDNA 2200002D01 gene(2200002D01Rik) | Non-coding | Up |
| RIKEN cDNA 9530082P21 gene(9530082P21Rik) | Non-coding | Up |
| predicted gene, 38426(Gm38426) | Non-coding | Down |
| RIKEN cDNA 1300017J02 gene(1300017J02Rik) | Non-coding | Down |
| RIKEN cDNA 4932438A13 gene(4932438A13Rik) | Non-coding | Down |
| expressed sequence AW549877(AW549877) | Non-coding | Down |
| RIKEN cDNA 1700019D03 gene(1700019D03Rik) | Non-coding | Down |
| predicted gene 12863(Gm12863) | Non-coding | Down |
| abhydrolase domain containing 11, opposite strand(Abhd11os) | Non-coding | Down |
| cDNA sequence BC051226(BC051226) | Non-coding | Down |
| RIKEN cDNA A630023A22 gene(A630023A22Rik) | Non-coding | Down |
| RIKEN cDNA 1700113A16 gene(1700113A16Rik) | Non-coding | Down |
| dimethylarginine dimethylaminohydrolase 1(Ddah1) | Oxydation | Up |
| dynein light chain LC8-type 1(Dynll1) | Oxydation | Up |
| nitric oxide synthase 2, inducible(Nos2) | Oxydation | Up |
| thioredoxin 1(Txn1) | Oxydation | Up |
| peroxisomal biogenesis factor 1(Pex1) | Oxydation | Down |
| dual oxidase 1(Duox1) | Oxydation | Down |
| calpain 3(Capn3) | Oxydation | Down |
| progestin and adipoQ receptor family member IX(Paqr9) | Pprogesterone | Down |
| proteasome (prosome, macropain) subunit, beta type 6(Psmb6) | Proteasome | Up |
| proteasome (prosome, macropain) subunit, beta type 5(Psmb5) | Proteasome | Up |
| proteasome (prosome, macropain) subunit, beta type 4(Psmb4) | Proteasome | Up |
| proteasome (prosome, macropain) subunit, beta type 10(Psmb10) | Proteasome | Up |
| proteasome (prosome, macropain) subunit, beta type 1(Psmb1) | Proteasome | Up |
| proteasome (prosome, macropain) subunit, beta type 8 (large multifunctional peptidase 7)(Psmb8) | Proteasome | Up |
| proteasome (prosome, macropain) subunit, beta type 9 (large multifunctional peptidase 2)(Psmb9) | Proteasome | Up |
| proteasome (prosome, macropain) subunit, alpha type 2(Psma2) | Proteasome | Up |
| proteasome (prosome, macropain) subunit, beta type 3(Psmb3) | Proteasome | Up |
| proteasome (prosome, macropain) subunit, beta type 2(Psmb2) | Proteasome | Up |
| proteasome (prosome, macropain) subunit, alpha type 7(Psma7) | Proteasome | Up |
| proteasome (prosome, macropain) subunit, alpha type 6(Psma6) | Proteasome | Up |
| proteasome (prosome, macropain) subunit, alpha type 5(Psma5) | Proteasome | Up |
| proteasome (prosome, macropain) subunit, alpha type 4(Psma4) | Proteasome | Up |
| proteasome (prosome, macropain) subunit, alpha type 1(Psma1) | Proteasome | Up |
| desumoylating isopeptidase 1(Desi1) | Proteasome | Up |
| protease (prosome, macropain) 26S subunit, ATPase 5(Psmc5) | Proteasome | Up |
| proteasome (prosome, macropain) subunit, beta type 7(Psmb7) | Proteasome | Up |
| proteasome (prosome, macropain) 26S subunit, non-ATPase, 11(Psmd11) | Proteasome | Up |
| proteasome (prosome, macropain) 26S subunit, non-ATPase, 12(Psmd12) | Proteasome | Up |
| proteasome (prosome, macropain) 26S subunit, non-ATPase, 13(Psmd13) | Proteasome | Up |
| proteasome (prosome, macropain) 26S subunit, non-ATPase, 2(Psmd2) | Proteasome | Up |
| COP9 signalosome subunit 5(Cops5) | Proteasome | Up |
| F-box and WD-40 domain protein 17(Fbxw17) | Proteasome | Up |
| F-box and WD-40 domain protein 9(Fbxw9) | Proteasome | Up |
| F-box and leucine-rich repeat protein 5(Fbxl5) | Proteasome | Up |
| F-box protein 6(Fbxo6) | Proteasome | Up |
| clusterin(Clu) | Proteasome | Up |
| protease (prosome, macropain) 26S subunit, ATPase 1(Psmc1) | Proteasome | Up |
| proteasome (prosome, macropain) 26S subunit, ATPase, 4(Psmc4) | Proteasome | Up |
| proteasome (prosome, macropain) 26S subunit, non-ATPase, 1(Psmd1) | Proteasome | Up |
| proteasome (prosome, macropain) 26S subunit, non-ATPase, 10(Psmd10) | Proteasome | Up |
| proteasome (prosome, macropain) 26S subunit, non-ATPase, 14(Psmd14) | Proteasome | Up |
| proteasome (prosome, macropain) activator subunit 1 (PA28 alpha)(Psme1) | Proteasome | Up |
| proteasome (prosome, macropain) activator subunit 2 (PA28 beta)(Psme2) | Proteasome | Up |
| proteasome maturation protein(Pomp) | Proteasome | Up |
| ubiquitin D(Ubd) | Proteasome | Up |
| ubiquitin-conjugating enzyme E2L 6(Ube2l6) | Proteasome | Up |
| von Hippel-Lindau tumor suppressor(Vhl) | Proteasome | Up |
| zinc finger, AN1-type domain 2A(Zfand2a) | Proteasome | Up |
| FAD-dependent oxidoreductase domain containing 2(Foxred2) | Proteasome | Down |
| cathepsin F(Ctsf) | Proteasome | Down |
| transferrin(Trf) | Telomeres | Down |
| tripartite motif-containing 30A(Trim30a) | Transcription | Up |
| tripartite motif-containing 21(Trim21) | Transcription | Up |
| tripartite motif-containing 30B(Trim30b) | Transcription | Up |
| ring finger protein 213(Rnf213) | Transcription | Up |
| ring finger protein 114(Rnf114) | Transcription | Up |
| tripartite motif-containing 14(Trim14) | Transcription | Up |
| transcription factor CP2-like 1(Tfcp2l1) | Transcription | Up |
| forkhead box I1(Foxi1) | Transcription | Up |
| nuclear factor, erythroid derived 2, like 3(Nfe2l3) | Transcription | Up |
| Kruppel-like factor 7 (ubiquitous)(Klf7) | Transcription | Up |
| E2F transcription factor 5(E2f5) | Transcription | Up |
| MAX dimerization protein 1(Mxd1) | Transcription | Up |
| zinc finger protein 296(Zfp296) | Transcription | Up |
| mastermind-like domain containing 1(Mamld1) | Transcription | Up |
| mediator complex subunit 28(Med28) | Transcription | Up |
| zinc finger protein 503(Zfp503) | Transcription | Up |
| zinc finger protein 935(Zfp935) | Transcription | Up |
| zinc finger protein 296(Zfp296) | Transcription | Up |
| Kruppel-like factor 7 (ubiquitous)(Klf7) | Transcription | Up |
| PHD finger protein 11D(Phf11d) | Transcription | Up |
| CCR4-NOT transcription complex, subunit 6(Cnot6) | Transcription | Up |
| Moloney leukemia virus 10(Mov10) | Transcription | Up |
| Y box protein 1(Ybx1) | Transcription | Up |
| coiled-coil domain containing 12(Ccdc12) | Transcription | Up |
| eukaryotic translation initiation factor 3, subunit F(Eif3f) | Transcription | Up |
| general transcription factor IIIC, polypeptide 5(Gtf3c5) | Transcription | Up |
| heterogeneous nuclear ribonucleoprotein A1(Hnrnpa1) | Transcription | Up |
| high mobility group nucleosomal binding domain 1(Hmgn1) | Transcription | Up |
| high mobility group nucleosomal binding domain 2(Hmgn2) | Transcription | Up |
| lysine (K)-specific demethylase 3A(Kdm3a) | Transcription | Up |
| nuclear receptor coactivator 7(Ncoa7) | Transcription | Up |
| polyhomeotic-like 2 (Drosophila)(Phc2) | Transcription | Up |
| ribosome production factor 1 homolog(Rpf1) | Transcription | Up |
| serine/arginine-rich splicing factor 3(Srsf3) | Transcription | Up |
| sex comb on midleg homolog 1(Scmh1) | Transcription | Up |
| tudor domain containing 3(Tdrd3) | Transcription | Up |
| tudor domain containing 7(Tdrd7) | Transcription | Up |
| zinc finger protein, multitype 1(Zfpm1) | Transcription | Up |
| queuine tRNA-ribosyltransferase 1(Qtrt1) | Transcription | Down |
| CDC like kinase 4(Clk4) | Transcription | Down |
| nuclear RNA export factor 7(Nxf7) | Transcription | Down |
| eukaryotic translation initiation factor 2 alpha kinase 3(Eif2ak3) | Transcription | Down |
| exportin, tRNA (nuclear export receptor for tRNAs)(Xpot) | Transcription | Down |
| lysine (K)-specific methyltransferase 2C(Kmt2c) | Transcription | Down |
| trinucleotide repeat containing 6a(Tnrc6a) | Transcription | Down |
| zinc finger protein 174(Zfp174) | Transcription | Down |
| zinc finger protein 101(Zfp101) | Transcription | Down |
| histone cluster 2, H2be(Hist2h2be) | Transcription | Down |
| histone cluster 2, H2be(Hist2h2be) | Transcription | Down |
| histone cluster 2, H4(Hist2h4) | Transcription | Down |
| cysteine-rich secretory protein LCCL domain containing 2(Crispld2) | Unknown | Up |
| expressed sequence AI464131(AI464131) | Unknown | Up |
| transmembrane protein 2(Tmem2) | Unknown | Up |
| transmembrane protein 229B(Tmem229b) | Unknown | Up |
| expressed sequence AW112010(AW112010) | Unknown | Up |
| SH3 domain binding glutamic acid-rich protein like 2(Sh3bgrl2) | Unknown | Up |
| SH3 domain containing 21(Sh3d21) | Unknown | Up |
| SNRPN upstream reading frame(Snurf) | Unknown | Up |
| armadillo repeat containing, X-linked 4(Armcx4) | Unknown | Up |
| family with sequence similarity 212, member B(Fam212b) | Unknown | Up |
| glutamate rich 3(Erich3) | Unknown | Up |
| hect domain and RLD 6(Herc6) | Unknown | Up |
| serine (or cysteine) peptidase inhibitor, clade A, member 3N(Serpina3n) | Unknown | Up |
| spermatogenesis associated, serine-rich 2-like(Spats2l) | Unknown | Up |
| Rho guanine nucleotide exchange factor (GEF) 40(Arhgef40) | Unknown | Down |
| rogdi homolog(Rogdi) | Unknown | Down |
| dickkopf-like 1(Dkkl1) | Unknown | Down |
| RNA binding motif protein 48(Rbm48) | Unknown | Down |
| BEN domain containing 7(Bend7) | Unknown | Down |
| transmembrane protein 179(Tmem179) | Unknown | Down |
| Sec1 family domain containing 2(Scfd2) | Unknown | Down |
| HID1 domain containing(Hid1) | Vesicles | Down |
| trafficking protein particle complex 6A(Trappc6a) | Vesicles | Down |
| syntaxin 5A(Stx5a) | Vesicles | Down |
| KDEL (Lys-Asp-Glu-Leu) endoplasmic reticulum protein retention receptor 3(Kdelr3) | Vesicles | Down |
| disabled 2, mitogen-responsive phosphoprotein(Dab2) | Vesicles | Down |
| synaptogyrin 1(Syngr1) | Vesicles | Down |
| solute carrier family 17, member 9(Slc17a9) | Vesicles | Down |
| RAB3A interacting protein (rabin3)-like 1(Rab3il1) | Vesicles | Down |
| zinc finger like protein 1(Zfpl1) | Vesicles | Down |
| SEC22 homolog B, vesicle trafficking protein(Sec22b) | Vesicles | Down |
| DnaJ heat shock protein family (Hsp40) member C6(Dnajc6) | Vesicles | Down |
| TBC1 domain family, member 14(Tbc1d14) | Vesicles | Down |
| golgi autoantigen, golgin subfamily a, 3(Golga3) | Vesicles | Down |
| coatomer protein complex, subunit beta 1(Copb1) | Vesicles | Down |
| ADP-ribosylation factor interacting protein 2(Arfip2) | Vesicles | Down |
| golgi integral membrane protein 4(Golim4) | Vesicles | Down |
| tetraspanin 8(Tspan8) | Vesicles | Down |
| golgi autoantigen, golgin subfamily b, macrogolgin 1(Golgb1) | Vesicles | Down |
| Sec31 homolog A (S. cerevisiae)(Sec31a) | Vesicles | Down |
| Sec24 related gene family, member A (S. cerevisiae)(Sec24a) | Vesicles | Down |
| DENN/MADD domain containing 3(Dennd3) | Vesicles | Down |
| small integral membrane protein 14(Smim14) | Vesicles | Down |
| golgi autoantigen, golgin subfamily a, 4(Golga4) | Vesicles | Down |
| Sec24 related gene family, member D (S. cerevisiae)(Sec24d) | Vesicles | Down |
| RALBP1 associated Eps domain containing protein 2(Reps2) | Vesicles | Down |
| Rap guanine nucleotide exchange factor (GEF) 5(Rapgef5) | Vesicles | Down |
| gametogenetin binding protein 1(Ggnbp1) | Vesicles | Down |
| Sec31 homolog B (S. cerevisiae)(Sec31b) | Vesicles | Down |
| RAB7B, member RAS oncogene family(Rab7b) | Vesicles | Down |
| ADP-ribosylation factor GTPase activating protein 3(Arfgap3) | Vesicles | Down |
| KDEL (Lys-Asp-Glu-Leu) endoplasmic reticulum protein retention receptor 2(Kdelr2) | Vesicles | Down |
| aspartic peptidase, retroviral-like 1(Asprv1) | Wound healing / skin | Up |
| claudin 1(Cldn1) | Wound healing / skin | Up |
| dermokine(Dmkn) | Wound healing / skin | Up |
| fermitin family member 1(Fermt1) | Wound healing / skin | Up |
| serine (or cysteine) peptidase inhibitor, clade H, member 1(Serpinh1) | Wound healing / skin | Up |
| serine peptidase inhibitor, Kazal type 6(Spink6) | Wound healing / skin | Up |
| keratinocyte associated protein 3(Krtcap3) | Wound healing / skin | Up |
| keratin 14(Krt14) | Wound healing / skin | Up |
| lamin B1(Lmnb1) | Wound healing / skin | Up |
| keratin 8(Krt8) | Wound healing / skin | Up |
| syncoilin(Sync) | Wound healing / skin | Up |
| keratin 5(Krt5) | Wound healing / skin | Up |
| matrix metallopeptidase 13(Mmp13) | Wound healing / skin | Up |
| a disintegrin-like and metallopeptidase (reprolysin type) with thrombospondin type 1 motif, 8(Adamts8) | Wound healing / skin | Up |
| matrix metallopeptidase 9(Mmp9) | Wound healing / skin | Up |
| matrix metallopeptidase 8(Mmp8) | Wound healing / skin | Up |
| a disintegrin-like and metallopeptidase (reprolysin type) with thrombospondin type 1 motif, 4(Adamts4) | Wound healing / skin | Up |
| matrix metallopeptidase 3(Mmp3) | Wound healing / skin | Up |
| coxsackie virus and adenovirus receptor(Cxadr) | Wound healing / skin | Up |
| discoidin domain receptor family, member 1(Ddr1) | Wound healing / skin | Up |
| opioid Growth factor receptor(Ogfr) | Wound healing / skin | Up |

**Table S2:** Expression (fold change and standard deviation) of individual cytokines in lipopolysaccharide treated mammary gland compared to PBS treated gland, analysed by RNA sequencing.*P* values were adjusted by Benjamini-Hochberg correction for multiple testing(Padj).

| Name | FC avg | FC std | Padj |
| --- | --- | --- | --- |
| CXCL16 | 1.41 | 0.07 | 0.016892 |
| Eotaxin | 2.21 | 0.82 | 0.0000342 |
| ENA-78 | 20.32 | 18.3 | 0.000265 |
| Fractalkine | 1.83 | 0.30 | 0.00107 |
| G-CSF | 3.54 | 1.22 | 0.0039694 |
| GM-CSF | N/A | N/A | 0.56113 |
| M-CSF | 1.61 | 0.12 | 0.0058575 |
| KC | 1.19 | 0.35 | 0.80789 |
| IL-1α | 5.37 | 4.88 | 0.0011948 |
| IL-1β | 4.72 | 2.74 | 0.0000372 |
| IL-1f6 | 1.78 | 0.15 | 0.019054 |
| IL-2 | 0.94 | 0.01 | N/A |
| IL-4 | 0.76 | 0.39 | N/A |
| IL-6 | 29.16 | 17.29 | 0.0000003 |
| IL-7 | 1.66 | 0.91 | 0.58226 |
| Il-9 | N/A | N/A | N/A |
| IL-10 | 3.05 | 1.24 | N/A |
| IL-12α | N/A | N/A | N/A |
| IL-12β | 4.17 | 5.50 | N/A |
| IL-13 | N/A | N/A | N/A |
| IL-15 | 1.61 | 0.56 | 0.091686 |
| Il-17α | N/A | N/A | N/A |
| IL-17β | 1.85 | 1.41 | N/A |
| INF-y | N/A | N/A | N/A |
| IP-9 | 4.32 | 2.87 | 0.010742 |
| IP-10 | 2.04 | 1.25 | 0.25225 |
| LIF | 1.35 | 0.35 | 0.80235 |
| LIX | 25.36 | 18.30 | 0.0002655 |
| Lungkine | 11.81 | 11.97 | 0.0029982 |
| MCP-1 | 4.23 | 2.87 | 0.0000028 |
| MCP-3 | 2.58 | 1.68 | 0.00000384 |
| MIF | 1.50 | 0.31 | 0.01964 |
| MIG | 1.50 | 0.47 | 0.54964 |
| MIP-1α | 7.10 | 5.73 | 0.0000392 |
| MIP-1β | 4.01 | 2.20 | 0.0010228 |
| MIP-2α | 1.47 | 0.48 | 0.54785 |
| MIP-2β | 5.07 | 1.37 | 0.0000007 |
| MIP3A | 2.47 | 0.62 | 0.000203 |
| RANTES | 1.51 | 0.30 | 0.012641 |
| TNFα | 2.00 | 0.53 | 0.36481 |
| VCC-1 | 0.48 | 0.13 | 0.007508 |
| VEGFA | 0.64 | 0.15 | 7.18E-08 |
| VEGFB | 0.91 | 0.10 | 0.48035 |
| VEGCC | 0.77 | 0.28 | 0.53064 |
| fc = fold change, avg = average, std = standard deviation, N/A = not enough reads in samples to provide reliable analysis, VCC-1 = VEGF co-regulated chemokine 1 | | | |

**Table S3:** Fold changes of mRNA expression obtained by RNA sequencing (RNA-seq) and real time PCR (RT-qPCR) in the mammary gland infused with lipopolysaccharide (LPS) for 12 h compared to the gland infused with PBS.

| **Gene** | **Fold changes (LPS vs PBS, 12h)** | |
| --- | --- | --- |
|  | **RNA-seq** | **RT-qPCR** |
| *Il1B* | 4.19 ± 1.08* | 5.96 ± 2.02 |
| *Il6* | 19.23 ± 5.61* | 44.28 ± 15.60* |
| *Tnf* | 1.83 ± 0.49* | 2.20 ± 0.55* |
| *Csn1S1* | 0.94 ± 0.09 | 1.02 ± 0.16 |
| *Csn2* | 0.61 ± 0.06** | 0.69 ± 0.09* |
| *Lalba* | 0.74 ± 0.05* | 0.76 ± 0.11* |
| *Bax* | 1.33 ± 0.10 | 1.37 ± 0.11** |
| *Bcl2* | 0.73 ± 0.14 | 0.59 ± 0.24 |
| *Bad* | 1.04 ± 0.08 | 0.97 ± 0.07 |
|  | * *P*adj < 0.05, ** *P*adj < 0.01 | * *P* < 0.05, ** *P* < 0.01 |
| **R2 = 0.97** | | |

**Table S4:** Fold changes and *P*-values of 32 cytokines in the mammary gland infused with lipopolysaccharide for 12 h compared to the gland infused with PBS and in plasma of mice before and after intramammary infusion of LPS for 12 h.

|  | Tissue | | Plasma | |
| --- | --- | --- | --- | --- |
|  | **Fold-Change** | **p-value** | **Fold-change** | **p-value** |
| **Eotaxin** | 1.39 | 0.0576 | 1.72 | 0.0161 |
| **G-CSF** | 1.13 | 0.0858 | 326.92 | 0.0001 |
| **GM-CSF** | 2.65 | 0.8769 | 1.00 | 1 |
| **IFNγ** | 0.87 | 0.0099 | 7.03 | 0.0196 |
| **IL-1α** | 1.00 | 0.9741 | 10.57 | 0.0001 |
| **IL-1β** | 1.63 | 0.3556 | 6.84 | 0.0564 |
| **IL-2** | 0.82 | 0.0437 | 2.69 | 0.0157 |
| **IL-3** | 1.00 | 0.1579 | 1.16 | 0.2679 |
| **IL-4** | 0.64 | 0.0007 | 1.31 | 0.5997 |
| **IL-5** | 2.63 | 0.027 | 7.23 | 0.0123 |
| **IL-6** | 5.47 | 0.0449 | 2019.17 | 0.0005 |
| **IL-7** | 0.96 | 0.6484 | 3.21 | 0.0526 |
| **IL-9** | 0.87 | 0.2057 | 0.66 | 0.0378 |
| **IL-10** | 0.77 | 0.0038 | 9.41 | 0.0001 |
| **IL-12 (p40)** | 0.77 | 0.0035 | 3.98 | 0.0577 |
| **IL-12 (p70)** | 0.97 | 0.8205 | 1.04 | 0.3739 |
| **IL-13** | 1.02 | 0.7961 | 2.05 | 0.0007 |
| **IL-15** | 0.90 | 0.2523 | 1.11 | 0.3411 |
| **IL-17** | 1.56 | 0.2452 | 14.14 | 0.0055 |
| **IP-10** | 2.90 | 0.0128 | 17.07 | 0.0001 |
| **KC** | 1.05 | 0.1619 | 34.57 | 0.0194 |
| **LIF** | 2.38 | 0.018 | 2.11 | 0.2685 |
| **LIX** | 1.44 | 0.2233 | 3.38 | 0.7759 |
| **MCP-1** | 4.26 | 0.0189 | 255.98 | 0.0153 |
| **M-CSF** | 2.32 | 0.0987 | 2.01 | 0.0113 |
| **MIG** | 1.85 | 0.2288 | 38.73 | 0.0001 |
| **MIP-1α** | 1.73 | 0.1059 | 7.60 | 0.0097 |
| **MIP-1β** | 3.49 | 0.0625 | 35.04 | 0.0068 |
| **MIP-2** | 1.18 | 0.0041 | 24.40 | 0.0011 |
| **RANTES** | 1.57 | 0.0711 | 45.80 | 0.0001 |
| **TNFα** | 1.93 | 0.0105 | 15.15 | 0.0001 |
| **VEGF** | 0.96 | 0.4852 | 2.10 | 0.001 |

**Figure S1.** Most significantly up- (A) or down- (B) regulated GO terms by categories (metabolic function, cellular component, and biological process) in lipopolysaccharide treated mammary gland compared to PBS treated gland. n represents the number of genes corresponding to each GO term that were up-regulated. * Adjust *P* value < 0.05.

A

Metabolic functions


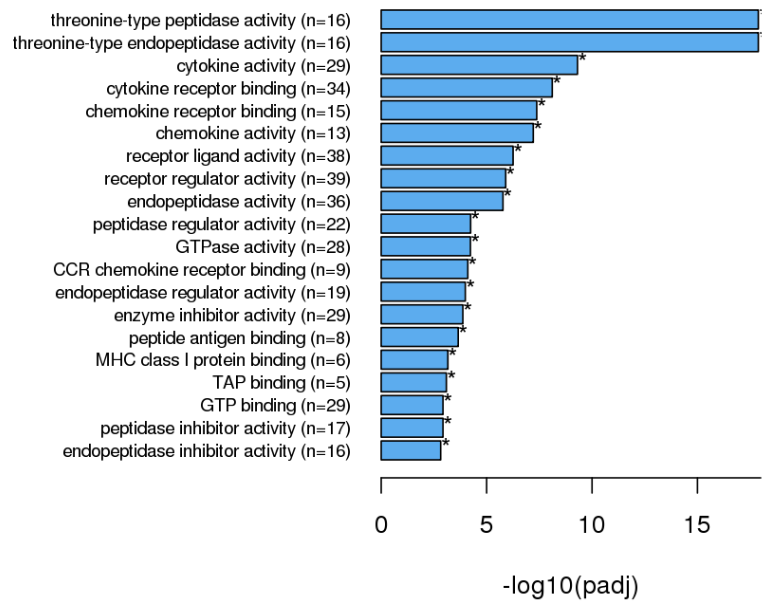


Cellular components


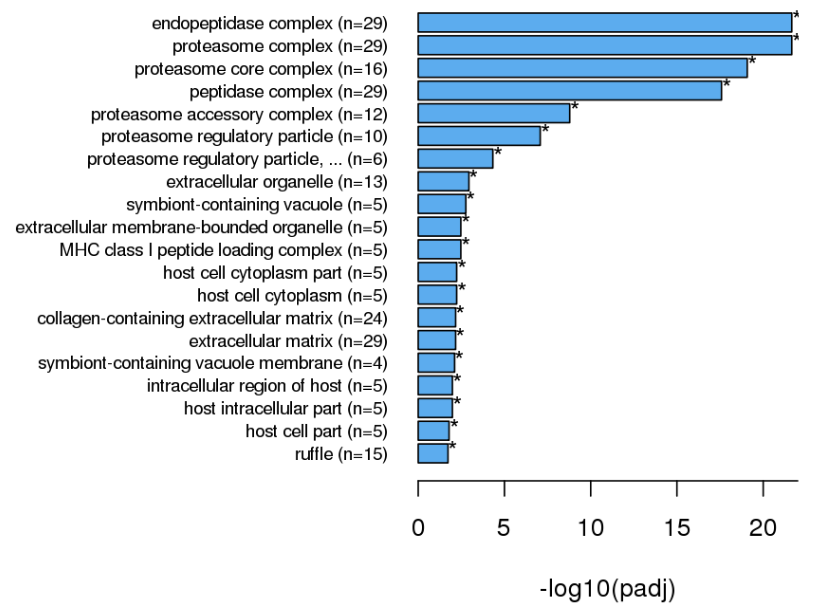


Biological processes


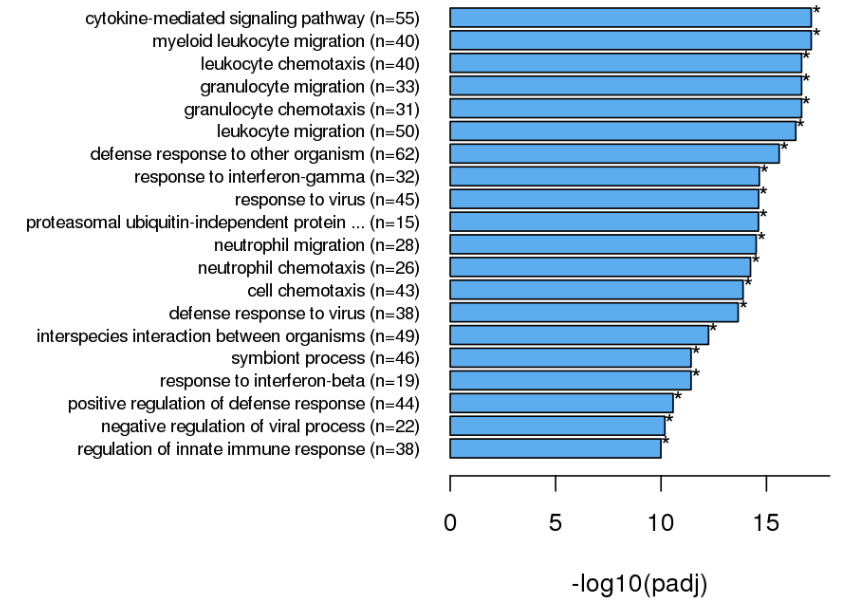


B

Metabolic functions


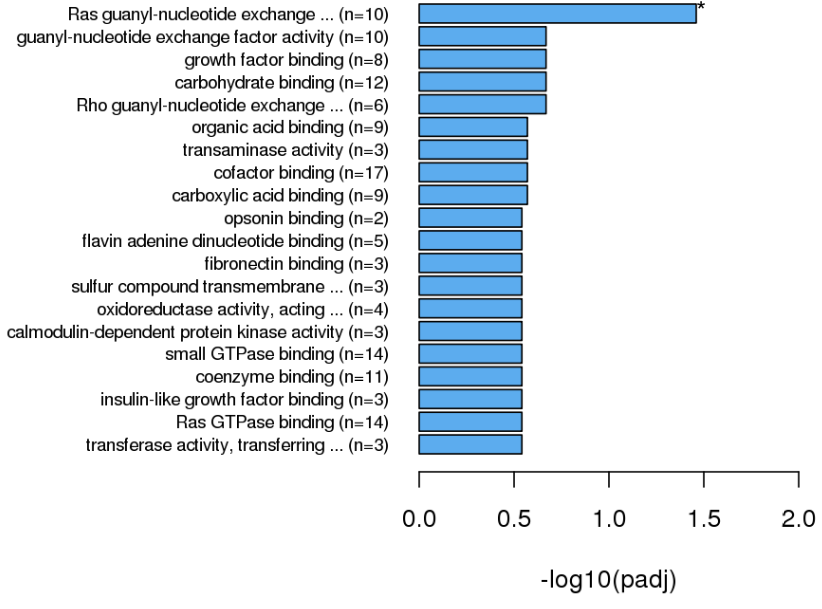


Cellular components


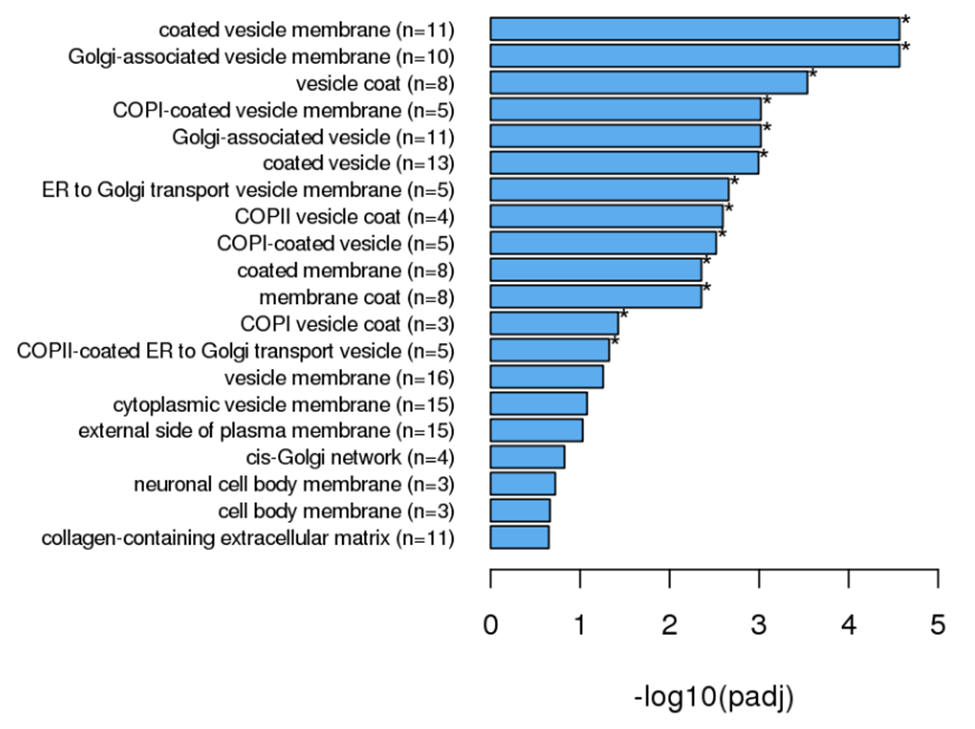


Biological processes


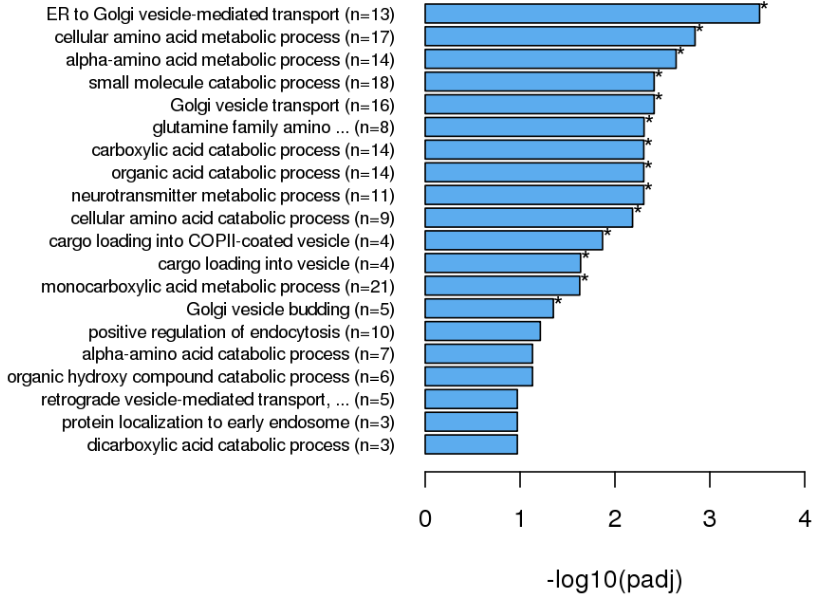

Supplement: Supplementary file 1 [file get_supplementary_file.php]
